# Supplementary material for: Comparative transcriptomic and proteomic kinetic analysis of adeno-associated virus production systems
Source: Springer Nature journal article supplement (doi:10.1007/s00253-024-13203-5), 2024-06-19
Supplement: MOESM1 [file 253_2024_13203_MOESM1_ESM.pdf]

**Supplemental Material**

**Applied Microbiology and Biotechnology**

**Comparative Transcriptomic and Proteomic Kinetic Analysis of Adeno-Associated Virus Production Systems**

Yu-Chieh Lin, Min Lu, Wen Cai, Wei-Shou Hu\*

Department of Chemical Engineering and Materials Science, University of Minnesota,

421 Washington Avenue S.E., Minneapolis, Minnesota 55455-0132

\*Corresponding Author

Wei-Shou Hu

Address: 421 Washington Avenue SE

Minneapolis, MN 55455-0132 USA

Email: wshu@umn.edu

Phone: (612) 626-7630

Fax: (612) 626-7246

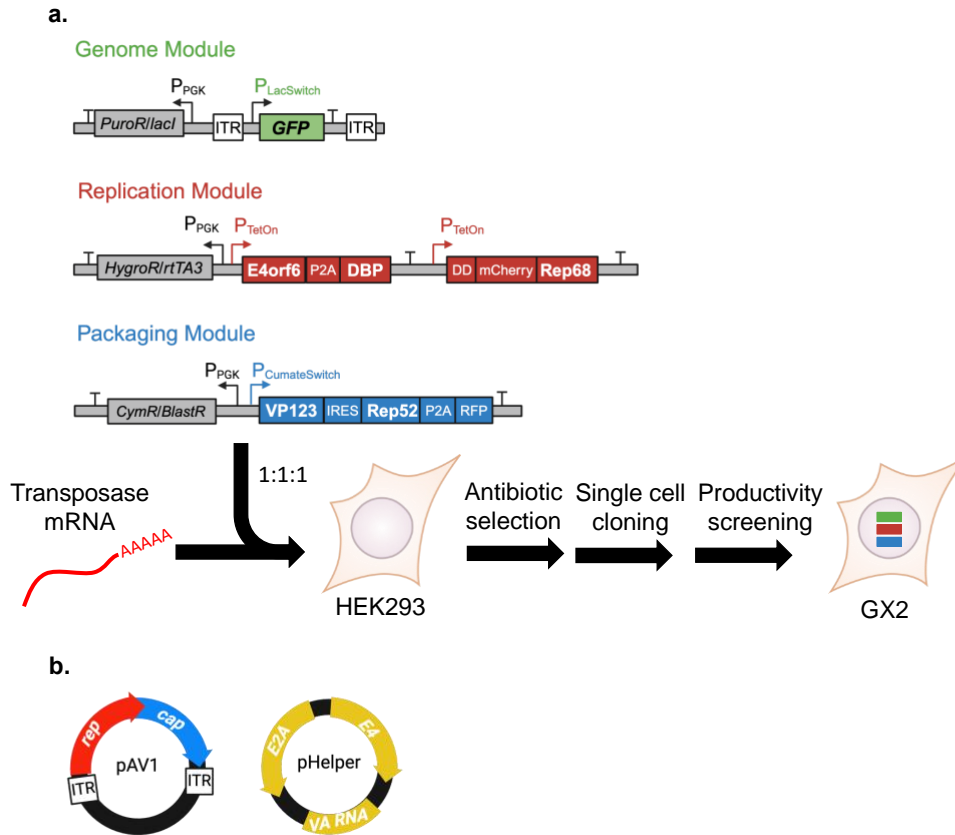

**Supplemental Fig. S1. Schematic diagram of (a) gene modules used for the construction of rAAV2 producer cell line GX2 construction and (b) pAV1 and pHelper plasmids. (a)** The genome of HEK293 cells were integrated with three transposon vectors: Genome Module contains a LacSwitch promoter-driven cargo gene *GFP* flanked by AAV2 inverted terminal repeats (ITRs) with a repressor gene *lacI* linked to a puromycin resistance gene driven by a phosphoglycerate kinase promoter ( $P_{PGK}$ ). Replication Module contains an adenoviral helper *E4orf6* and a DNA binding protein (DBP) CDS, and a destabilization domain (DD) and mCherry-tagged AAV2 Rep68 CDS under the control of inducible TetOn promoters with a reverse Tet transactivator gene *rtTA3* linked to a hygromycin resistance gene driven by a  $P_{PGK}$ . Packaging Modules contains an inducible CumateSwitch promoter-driven intron-less AAV2 *cap* CDS (VP123) linked to a Rep52 CDS via an internal ribosome entry site (IRES). In addition, the Rep52 CDS is linked through P2A to a small ultra-red fluorescent protein (smURFP) CDS. This module also contains a Cym repressor gene *CymR* linked to a blasticidin resistance gene driven by a  $P_{PGK}$ . Followed by antibiotic selection, single-cell cloning and productivity screening, clone GX2 was obtained. (b) pAV1 plasmid contains wtAAV2 genome, while pHelper plasmid contains adenoviral helper genes *E2A*, *E4* and *VA RNA*.

**a.**  
**GX2**  
24% (from 446 particles)

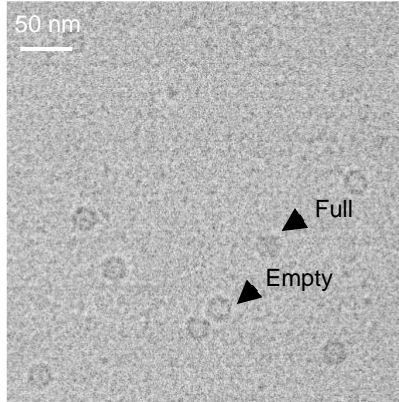

**b.**  
**wtAAV/Ad5 co-infection**  
48% (from 947 particles)

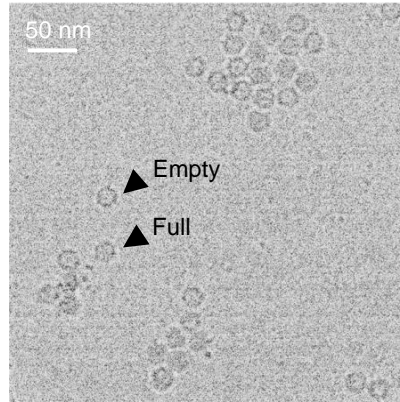

**c.**  
**wtAAV transfection**  
45% (from 731 particles)

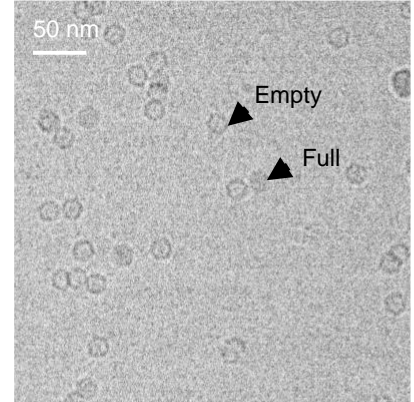

**Supplemental Fig. S2. Electron microscopic determination of full particle contents of viral particles produced in Case A (GX2) (a), Case B (wtAAV-Ad5 co-infection) (b) and Case C (wtAAV transfection) (c).** AAV particles were produced by induced GX2, wtAAV-Ad5-infected or pAV1-pHelper-transfected HEK293 cells in multiple 150 mm cell culture dishes and followed by purification using affinity chromatography. The procedure of AAV purification, sample preparation and equipment for cryogenic electron microscopy (Cryo-EM) were as described (Lu et al. 2024). The captured Cryo-EM images underwent image processing and the full and empty were manually counted to determine the full particle contents.

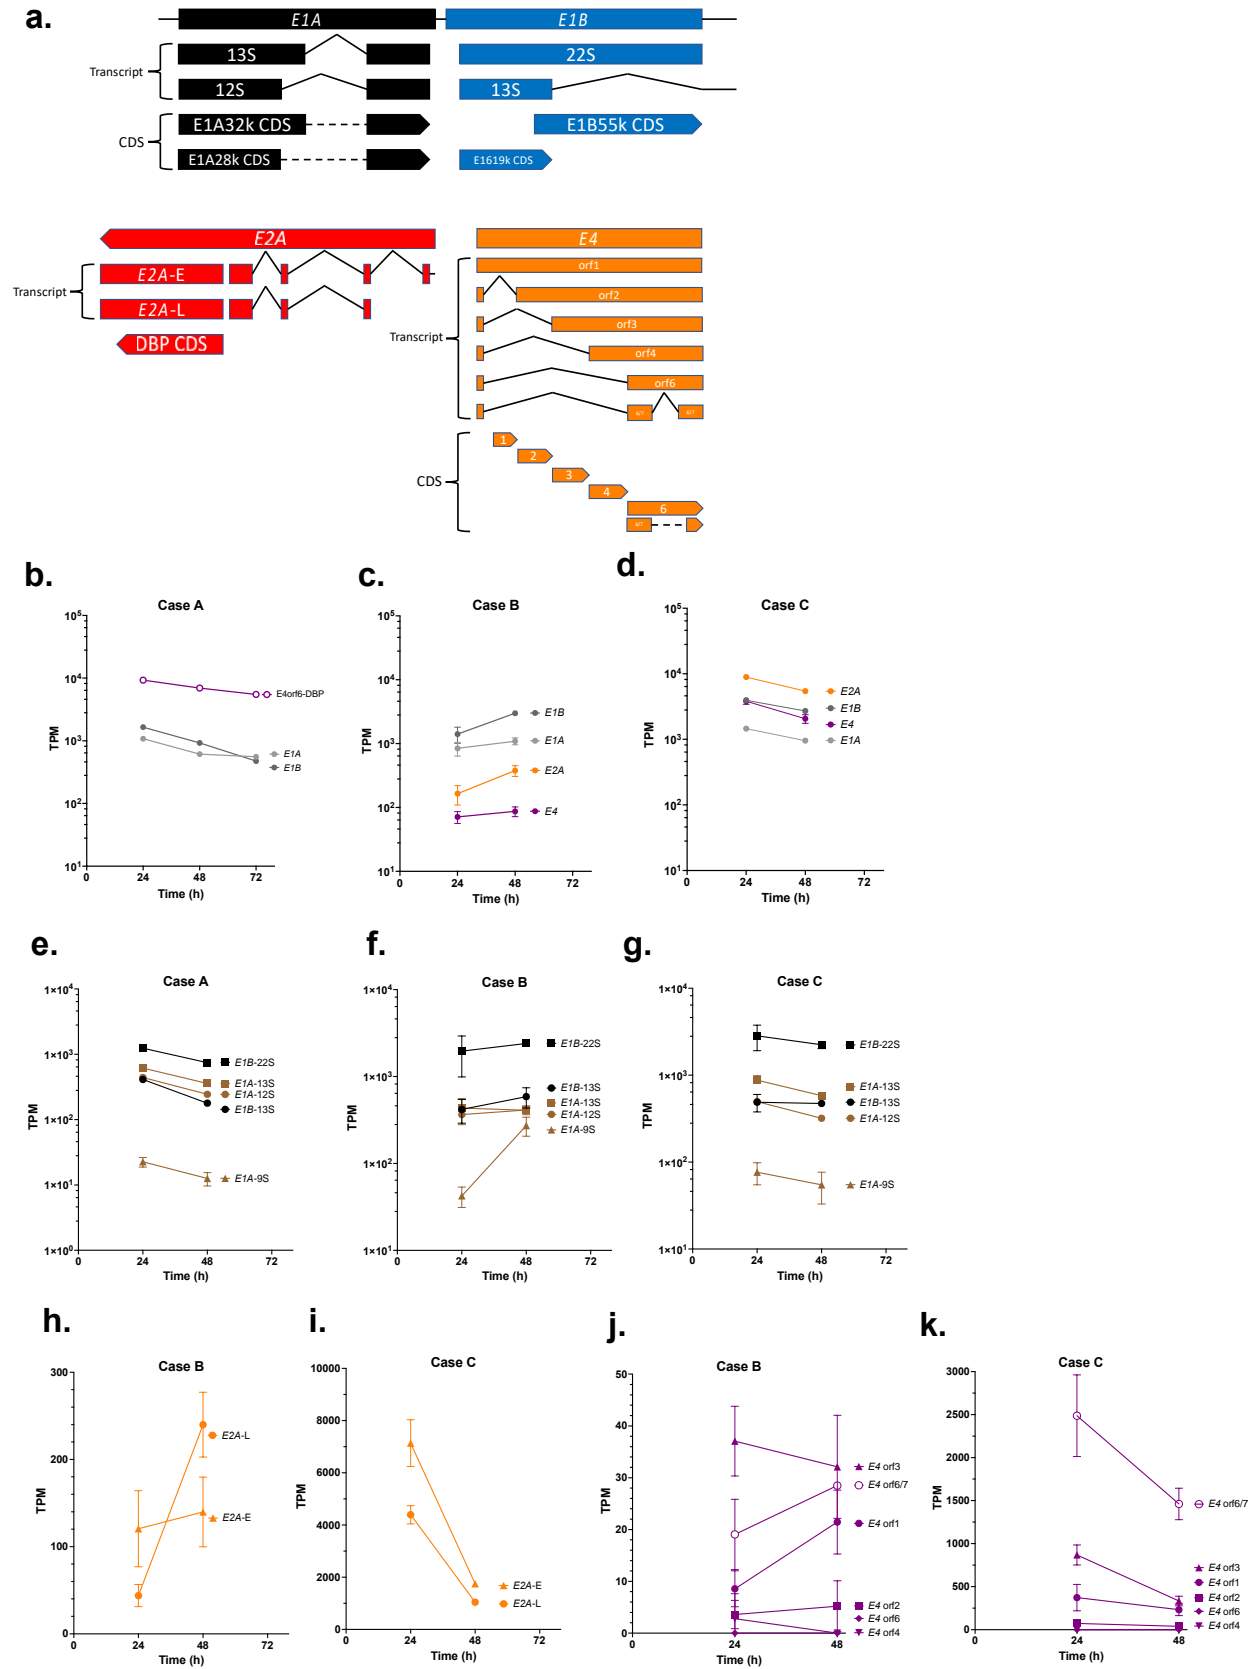

**Supplemental Fig. S3. Transcripts of adenoviral helper *E1A*, *E1B*, *E2A* and *E4* genes and their time dynamic during AAV production in three production systems.** (a) The schematic diagram of the alternatively spliced transcripts and protein coding sequences of *E1*, *E2* and *E4* genes. (b, e): GX2 (Case A); (c, f, h, j): wtAAV-Ad5 co-infection (Case B); and (d, g, i, k): wtAAV transfection (Case C). E4orf6-DBP denotes the transcript encoding E4orf6 and DBP in GX2. The data are presented as the means $\pm$ SDs (n=3). As shown in (b-d), *E1A* and *E1B* transcripts were expressed at high levels in HEK293. A TPM level of about  $10^3$  was seen at 24 h in all three cases. Ad5 co-infection provided additional *E1A* and *E1B* gene copies in Case B, but no major further increase of their transcripts was seen compared to other two cases. *E1B* transcript was more abundant than *E1A* transcript in all three cases. The abundance and dynamics of different alternatively spliced transcripts generated from *E1A* and *E1B* gene as shown in (e-g). The abundance level of different transcripts was in the same range among the three cases, but the dynamics varied somewhat in three cases. *E1B*-22S, encoding E1B-55k protein, was the most abundant among all alternatively spliced transcript isoforms of *E1A* and *E1B* in all three cases. The E1B-55k protein plays a key role in regulation of host cell response, which blocks p53 from inhibiting the cell cycle and prevents p53 from inducing apoptosis (Debbas and White 1993). Adenoviral *E2A* and *E4* are two additional helper genes commonly used in AAV production. They are both provided through co-infected Ad5 in Case B, and through the pHelper plasmids in Case C. In GX2, only E4orf6 CDS in *E4* and DBP CDS in *E2A* were provided as a single transcript E4orf6-DBP. In GX2, E4orf6-DBP transcript reached  $10^4$  transcript per million (TPM) levels at 24 h and stayed at this high level as shown in (b). In Case C, *E2A* and *E4* were also at a very high level as E4orf6-DBP transcript in GX2 as shown in (b) and (d). Surprisingly, the transcript expression of *E2A* and *E4* was more moderate in Case B as shown in (c). At 48 h, TPM of both *E2A* and *E4* were an order of magnitude lower than those in Case C. The lower *E2A* expression at the transcript level was also reflected at the protein level. At 24 h, DBP in Case B had a lower abundance than in Case A and C (Fig. 3j-l). The adenoviral *E2* and *E4* genes in either Ad5 or pHelper plasmids have alternatively spliced transcripts of varying abundance, in contrast to GX2, which has only DBP and E4orf6 CDS integrated, as shown in (h-k). Notably, transcripts encoding E4orf6/7, E4orf3 and E4orf1 had relatively higher expression levels compared to other *E4* alternatively spliced transcripts in either Case B and C. As reported, E4orf6/7 interacts with E2F transcription factors and plays a role in the regulation of DNA replication and cell cycle progression (Schaley et al. 2005). E4orf3 is involved in supporting viral replication and the inactivating cellular antiviral defenses (Araujo et al. 2005). E4orf1 encodes a protein that enhances host cell glucose uptake (Shastri et al. 2018). Taken together, it is

likely that these *E4*-encoded proteins could provide additional helper functions to both wtAAV cases and enhance their AAV productivity.

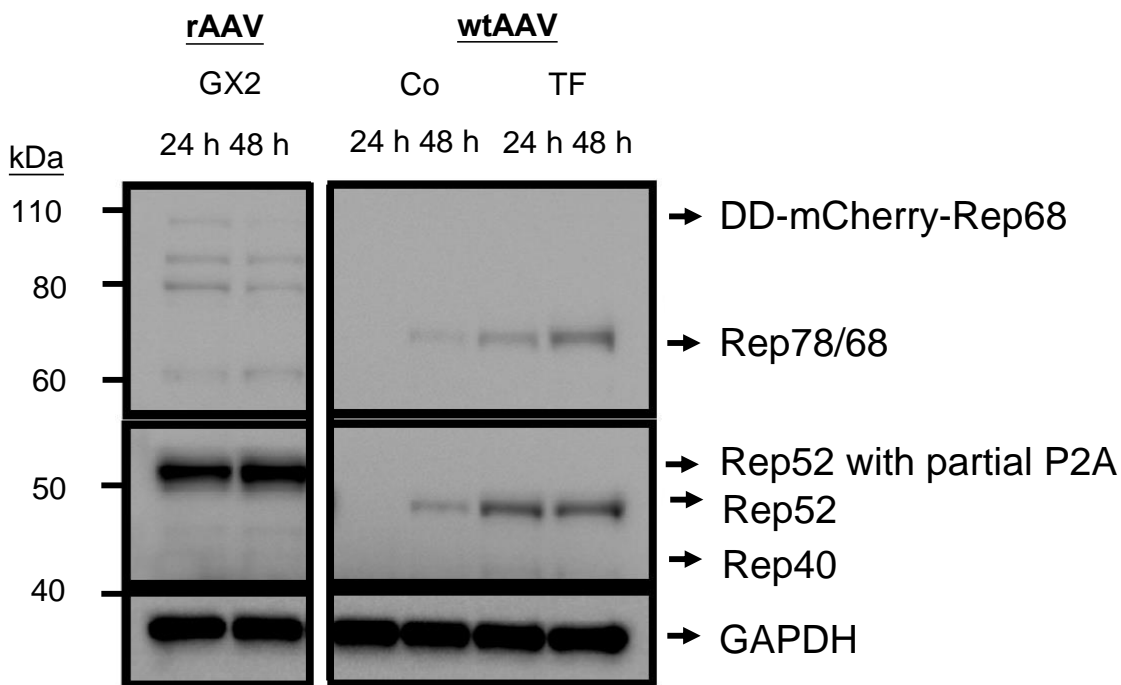

**Supplemental Fig. S4. Western blot analysis of Rep protein.** Samples were harvested at 24 and 48 h post induction, co-infection or transfection. The harvested cells were lysed using NP-40 cell lysis buffer containing protease inhibitors (Roche, Indianapolis, IN, USA). The obtained cell lysates were subsequently clarified via centrifugation and protein concentration was determined by bicinchoninic acid (BCA) protein assay (Thermo Fisher Scientific, Waltham, MA, USA). 10 µg of denatured and reduced proteins was loaded to each lane of NuPAGE Bis-Tris gels (Thermo Fisher Scientific, Waltham, MA, USA) and subsequently transferred to the 0.45 µm nitrocellulose membrane (Bio-Rad, Hercules, CA, USA). The blotted membranes were then incubated with mouse anti-AAV Rep protein (Fitzgerald, Gardner, MA, USA) and anti-GAPDH monoclonal antibodies (mAbs) (Cell Signaling Technology, Danvers, MA, USA) and corresponding anti-mouse IgG conjugated with alkaline phosphatase mAb (Sigma-Aldrich, St. Louis, MO, USA). The chemiluminescent signal was detected using the Immun-Star™ AP Chemiluminescence Kits (Bio-Rad, Hercules, CA, USA). Case A: GX2; Case B: wtAAV-Ad5 co-infection; Case C: wtAAV transfection. AAV2 Rep68 protein in GX2 was tagged by a destabilization domain (DD) and mCherry. The DD-tagged protein was ubiquitinated and degraded and seen in multiple bands (80-110 kDa). AAV2 Rep52 protein in GX2 was linked with small ultra-red fluorescent protein (smURFP) by the self-cleaving peptide P2A, a 22 amino acid peptide. After cleavage, a segment of 21 extra amino acids from P2A was attached to the Rep52 protein. Therefore, bands of Rep52 with partial P2A were observed in the Western blotting membrane.

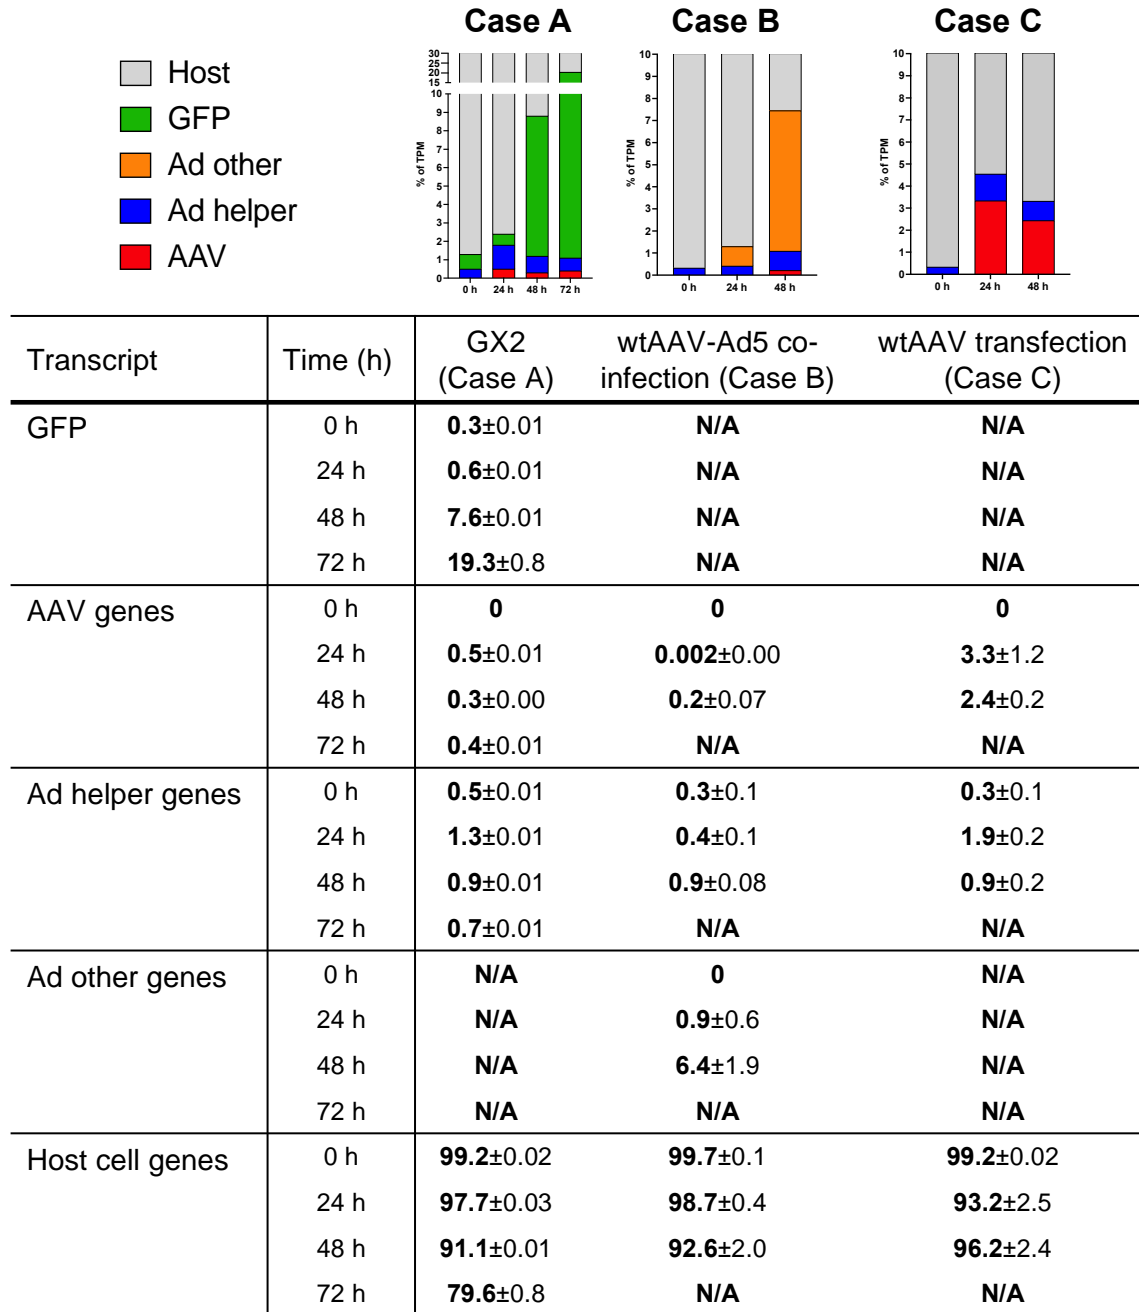

**Supplemental Fig. S5. Percentage of transcripts of different categories of genes in the three AAV systems.** In the upper figures, different colors indicate different categories of genes, and the y-axis indicates the percentage (%) of total transcripts per million (TPM). "Ad other" represents the transcripts generated by all adenoviral genes except helper genes. The details of the percentage of TPM of each category of genes in the three AAV cases at each measured time point are listed in the table below. N/A: Not applicable.



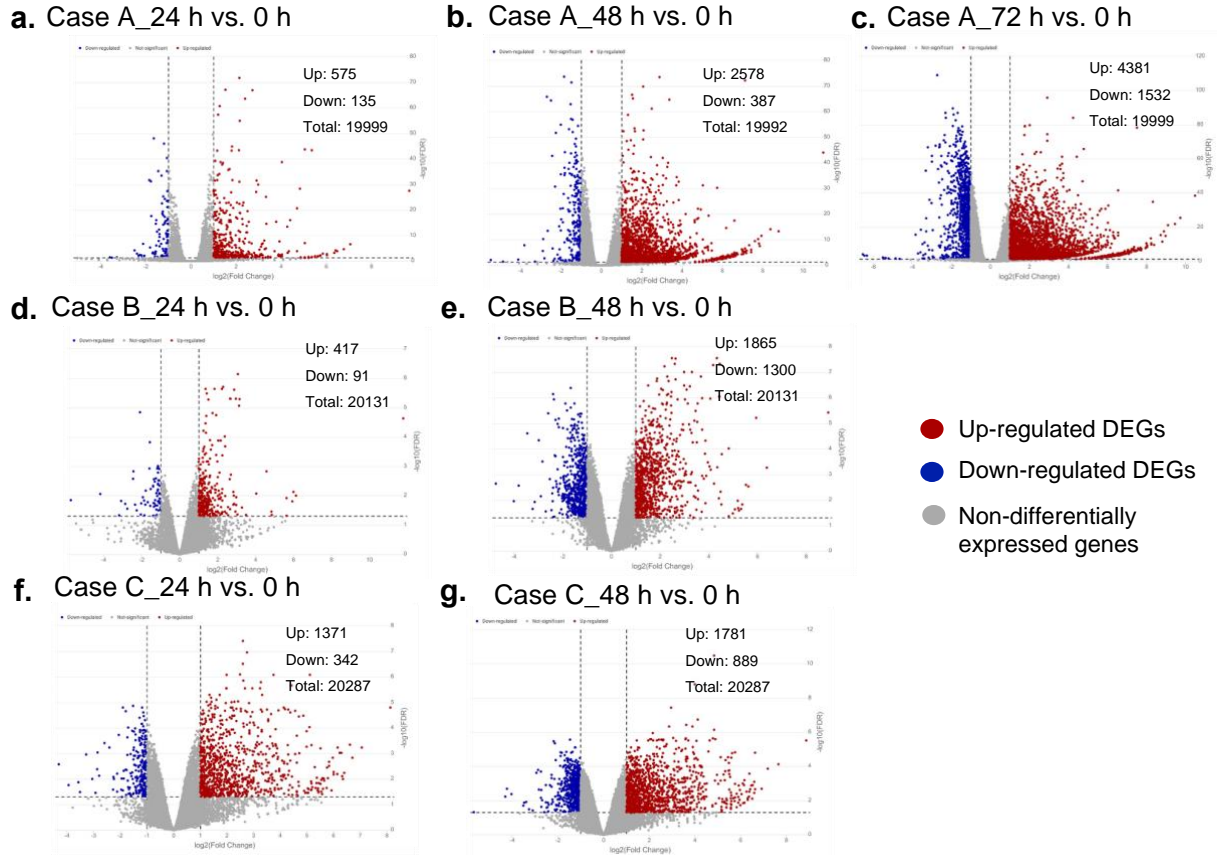

**Supplemental Fig. S6. Differential expression of transcripts in three AAV production systems.** (a-c): rAAV production by synthetic cell line GX2 cells induced with 10  $\mu\text{g/mL}$  doxycycline and 90  $\mu\text{g/mL}$  cumate (10D90C) for 24, 48 or 72 h were compared to that of uninduced GX2 cells (0 h); (d, e): wtAAV production by co-infection of HEK293 cells with wtAAV and Ad5. 24, 48 hours post infection (hpi) samples were compared to that of uninfected cells (0 hpi); (f, g): wtAAV production by plasmid transfection of HEK293 cells. Samples of 24, 48 hours post transfection (hpt) were compared to that of un-transfected cells (0 hpt). For all the comparisons, a threshold of  $|\text{Log}_2 \text{fold change (FC)}| > 1$  and FDR  $p\text{-value} < 0.05$  was used to identify differentially expressed genes (DEGs). In all three cases, about 20,000 transcripts were identified of which about 2600 to 3000 were differentially expressed at 48 h post induction, co-infection or transfection. The peak number of DEGs was seen at 72 h for Case A as shown in (c).

**a. Case A\_72 h vs. 0 h**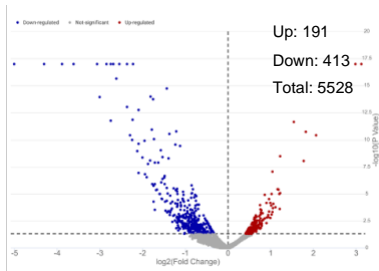**b. Case B\_24 h vs. 0 h**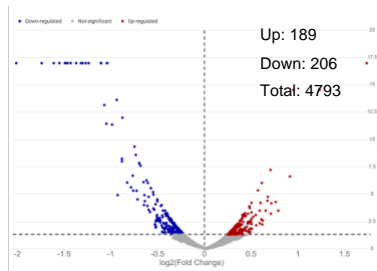**c. Case B\_48 h vs. 0 h**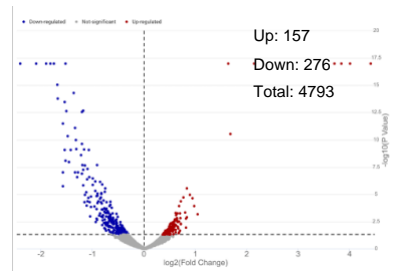**d. Case C\_48 h vs. 0 h**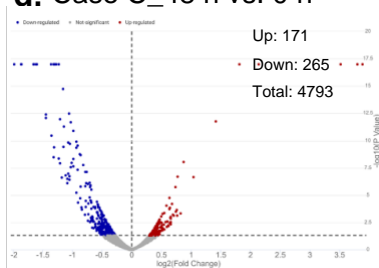

- Up-regulated DEPs
- Down-regulated DEPs
- Non-differentially expressed proteins

**Supplemental Fig. S7. Differential expression of proteins upon switching to different AAV production cases.**

(a) For Case A of rAAV production, the proteome of 10D90C-induced GX2 cells (72 h) was compared to that of uninduced cells (0 h). (b, c) For Case B of wtAAV production, the proteome of wtAAV-Ad5 co-infected HEK293 cells (24, 48 hpi) was compared to that of uninfected cells (0 hpi). (d) For Case C of wtAAV production, the proteome of pAV1-pHelper co-transfected HEK293 cells (48 hpt) was compared to that of un-transfected cells (0 hpt). For all the comparisons, a threshold of unadjusted  $p$ -value  $< 0.05$  was used to identify differentially expressed proteins (DEPs). In all three cases, about 5,000 proteins were identified. In each comparison, about 400 to 500 proteins were differentially expressed.

| Functional Annotation Cluster                | GX2<br>(Case A) |     | wtAAV-Ad5 co-infection<br>(Case B) |     | wtAAV transfection<br>(Case C) |     |
|----------------------------------------------|-----------------|-----|------------------------------------|-----|--------------------------------|-----|
|                                              | RNAseq          | TMT | RNAseq                             | TMT | RNAseq                         | TMT |
| Nucleosome assembly (I)                      | +               | +   |                                    |     | +                              | +   |
| Inflammation (II <sup>a</sup> )              | +               |     | +                                  | +   | +                              | +   |
| Immune response (II <sup>b</sup> )           | +               |     | +                                  | +   | +                              | +   |
| Unfolded protein response (III)              |                 | +   | +                                  |     |                                |     |
| Mitochondria biogenesis (IV <sup>1</sup> )   | +               | +   | +                                  | +   | +                              | +   |
| Respiratory chain (IV <sup>2</sup> )         | +               | +   | +                                  | +   |                                | +   |
| Oxidative phosphorylation (IV <sup>3</sup> ) | +               | +   | +                                  | +   |                                | +   |
| Gene expression (V)                          | +               | +   | +                                  | +   |                                | +   |
| MAPK signaling (U <sup>4</sup> )             | +               |     | +                                  | +   | +                              | +   |
| DNA damage response (U <sup>5</sup> )        |                 | +   |                                    | +   |                                |     |

**Supplemental Fig. S8. Overview of functional clusters enriched at transcript and protein levels in three AAV systems.** A “+” sign indicates that at least one GO term/KEGG pathway was enriched in a particular cluster at the transcript or protein level.

**a. GX2 vs. wtAAV-Ad5 co-infection**

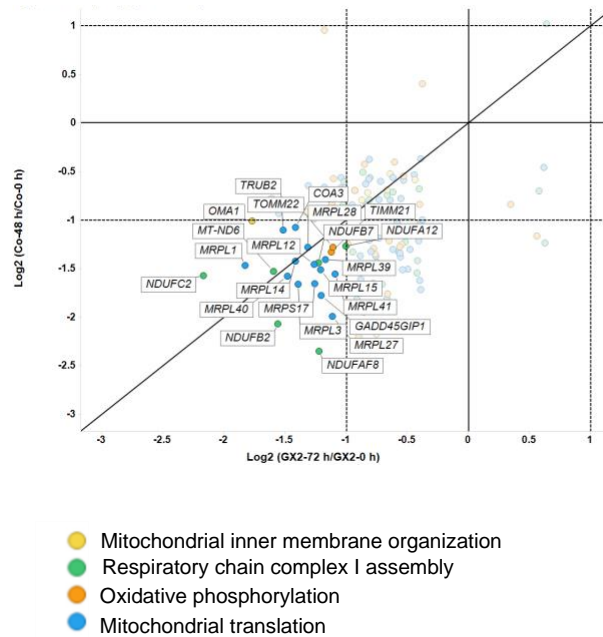

**b. GX2 vs. wtAAV transfection**

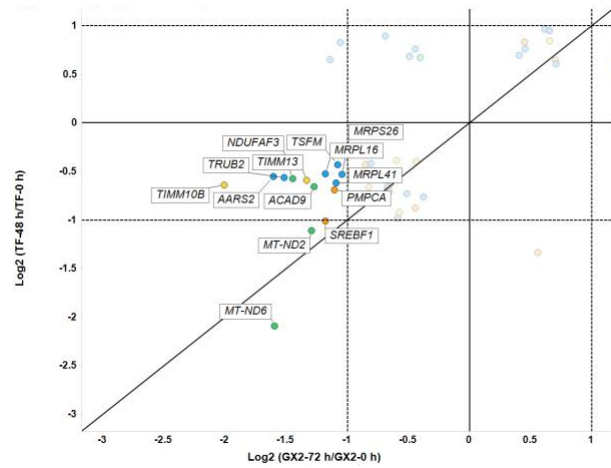

**Supplemental Fig. S9. Transcript fold change of mitochondrion-related genes in three AAV production**

**systems.** The fold change of all the genes in the term Inner mitochondrial membrane organization (GO: 0007007), Mitochondrial respiratory chain complex I assembly (GO:0032981), Oxidative phosphorylation (GO:0006119) and Mitochondrial translation (GO:0032543) were plotted. The fold change upon production of wtAAV by co-infection ( $\log_2(\text{Co-48 hpi}/\text{Co-0 hpi})$ ) (Case B) (a) and transfection ( $\log_2(\text{TF-48 hpi}/\text{TF-0 hpi})$ ) (Case C) (b) was compared to that by induction of GX2 ( $\log_2(\text{GX2-72 hpi}/\text{GX2-0 hpi})$ ). The dash line in (a) and (b) mark downregulation by twofold ( $\log_2 \text{FC} = -1$ ). All labeled mitochondrion-related genes had an FDR  $p$ -value below 0.05 in each comparison shown in the y-axis and x-axis titles of (a) and (b). Different colors indicate genes in different GO terms.

**a. GX2 vs. wtAAV-Ad5 co-infection**

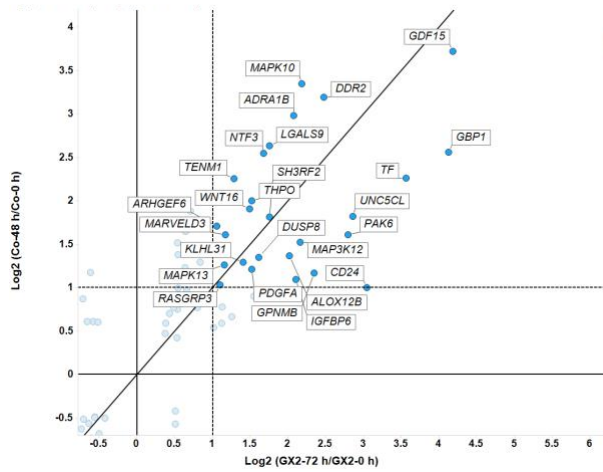

**b. GX2 vs. wtAAV transfection**

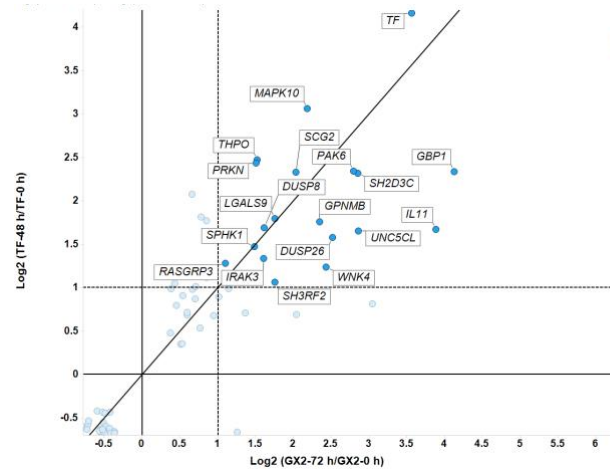

**Supplemental Fig. S10. Transcript fold change of genes in the term MAPK signaling (GO:0000165) in three AAV systems.** The fold change of all the MAPK signaling related genes were plotted and compared among three AAV cases. The fold change of antiviral genes upon production of wtAAV by co-infection ( $\log_2$  (Co-48 hpi/Co-0 hpi)) (Case B) (a) and transfection ( $\log_2$  (TF-48 hpi/TF-0 hpi)) (Case C) (b) was compared to that by induction of GX2 ( $\log_2$  (GX2-72 hpi/GX2-0 hpi)) (Case A). The dash line in (a) and (b) mark a twofold change ( $\log_2$  FC = 1). All labeled MAPK signaling-related genes had a FDR  $p$ -value below 0.05 in each comparison shown in the y-axis and x-axis titles of (a) and (b). *DUSP8* encodes dual specificity phosphatase 8, a key negative regulator of MAPK. Overexpression of *DUSP8* induces expression of the proapoptotic p53 upregulated modulator of apoptosis (PUMA), indicating the onset of programmed cell death (Lin et al. 2020). *GPNMB* encodes the transmembrane glycoprotein NMB, has been implicated in inflammation and neuroinflammation. Increased levels of *GPNMB* were commonly found in pro-inflammatory and pathological conditions (Saade et al. 2021). *SH3RF2* encodes a SH3-domain-containing RING finger protein, which is involved in promoting cell survival and apoptosis (Kim et al. 2014); *UNC5CL*, which encodes Unc-5 family C-terminal like protein, was identified as an inducer of a pro-inflammatory signaling cascade (Heinz et al. 2012). Across the transcript and protein levels, there were indications that functional classes related to inflammatory and immune responses were enriched (Cluster II in Fig. 4a and b). Together with the

upregulation of these MAPK signaling genes, the evidence for the occurrence of inflammation is stronger in all three cases.

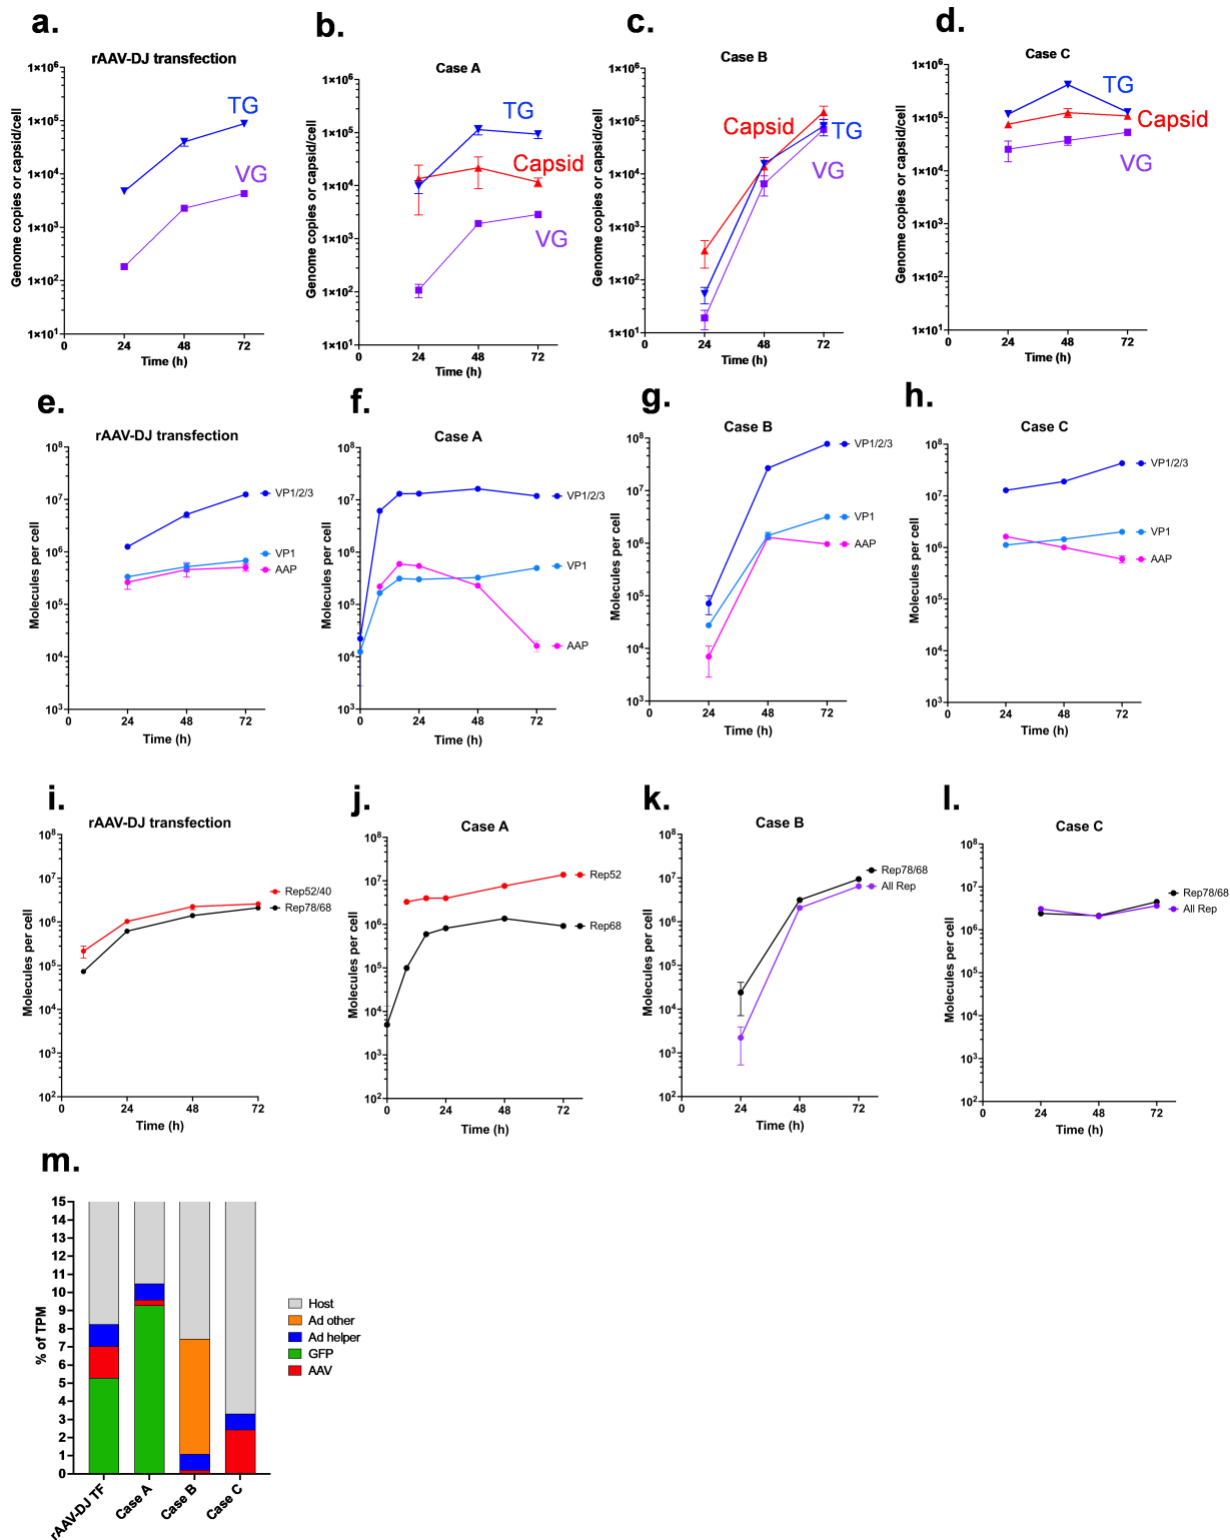

**Supplemental Fig. S11. Time dynamics of viral components, transcripts and proteins in the production of AAV.** (a, e, i): Recombinant AAV-DJ production by plasmid transfection of HEK293 cells (rAAV-DJ transfection),

(b, f, j) GX2 (Case A), (c, g, k): wtAAV-Ad5 co-infection (Case B), and (d, h, l): wtAAV transfection (Case C).

VP123-Rep52 denotes the transcript encoding VP1/2/3 and Rep52 in GX2. VP23A denotes the truncated transcript encoding VP2, VP3 and AAP. (m) Percentage of transcripts of different categories of genes in the four AAV production systems at 48 h. The y-axis indicates the percentage (%) of total transcripts per million (TPM). "Ad other" represents the transcripts generated by all adenoviral genes except helper genes.



**Supplemental Table S1.** Primers used in qPCR assay.

| Targeted Transcript | Sequence (5'-3')                                    | References               |
|---------------------|-----------------------------------------------------|--------------------------|
| <i>GFP</i>          | F: TTCAAGGACGACGGCAACTAC<br>R: TCGATGCCCTTCAGCTCGAT | Lee et al. (2022)        |
| AAV2 ITR            | F: GGAACCCCTAGTGATGGAGTT<br>R: CGGCCTCAGTGAGCGA     | Aurnhammer et al. (2012) |
| <i>GPR15</i>        | F: GGTCCCTGGTGGCCTTAATT<br>R: TTGCTGGTAATGGGCACACA  | Lu et al. (2024)         |

**Supplemental Table S2.** Sequences of heavy isotope-labeled peptides used in the targeted proteomics analysis (Lu et al. 2024).

| Targeted Protein             | Heavy isotope-labeled peptide sequence |
|------------------------------|----------------------------------------|
| EGFP                         | FSVSGEGEGDATYG[K_C13N15]               |
| Rep78, Rep68                 | GIEPTLPNWFAVT[K_C13N15]                |
| Rep78, Rep68, Rep52, Rep40   | TAPDYLVGQQPVEDISSN[R_C13N15]           |
| VP1, VP2, VP3                | HPPPQILI[K_C13N15]                     |
| VP1                          | QLDSGDNPYL[K_C13N15]                   |
| AAP                          | APTEWVIP[R_C13N15]                     |
| DBP                          | NVSLPVAHSDA[R_C13N15]                  |
| Beta-actin (encoded by ACTB) | AGFAGDDAPR[R_C13N15]                   |

**Supplemental Table S3.** Annotation of common mitochondrion-related DEGs in three AAV cases.

| Gene Name      | UniProt Accession<br>(Protein) | Description                                                           | Average TPM       |                 |                  |                  |                  | Log <sub>2</sub> (Relative protein abundance) |                      |                      |
|----------------|--------------------------------|-----------------------------------------------------------------------|-------------------|-----------------|------------------|------------------|------------------|-----------------------------------------------|----------------------|----------------------|
|                |                                |                                                                       | Host 293<br>(0 h) | Case A<br>(Uni) | Case A<br>(72 h) | Case B<br>(48 h) | Case C<br>(48 h) | Case A<br>(72 h/Uni)                          | Case B<br>(48 h/0 h) | Case C<br>(48 h/0 h) |
| <i>SREBF1</i>  |                                | Sterol regulatory element binding transcription factor 1              | 17.0              | 34.9            | 18.0             | 37.4             | 7.2              |                                               |                      |                      |
| <i>TIMM13</i>  | Q9Y5L4                         | Translocase of inner mitochondrial membrane 13                        | 211.8             | 219.5           | 99.2             | 144.6            | 113.7            | 0.04                                          | -0.35                | -0.10                |
| <i>TSFM</i>    | P43897                         | Ts translation elongation factor, mitochondrial                       | 65.0              | 70.2            | 32.8             | 51.4             | 49.9             | -0.75*                                        | 0.02                 | -0.04                |
| <i>AARS2</i>   | Q5J TZ9                        | Alanyl-tRNA synthetase 2, mitochondrial                               | 25.4              | 41.6            | 14.0             | 25.2             | 16.0             | -0.84*                                        | 0.03                 | -0.07                |
| <i>MRPS26</i>  | Q9BYN8                         | Mitochondrial ribosomal protein S26                                   | 115.3             | 127.6           | 67.2             | 108.3            | 72.8             | -0.38                                         | 0.11                 | -0.03                |
| <i>TIMM10B</i> | Q9Y5J6                         | Translocase of inner mitochondrial membrane 10B                       | 25.6              | 29.7            | 7.5              | 15.2             | 15.7             | 0.3                                           | -0.03                | 0.02                 |
| <i>PMPCA</i>   | Q10713                         | Peptidase, mitochondrial processing alpha subunit                     | 60.1              | 116.4           | 54.1             | 57.0             | 37.3             | -0.29                                         | -0.06                | -0.14                |
| <i>MRPL16</i>  |                                | Mitochondrial ribosomal protein L16                                   | 64.2              | 77.2            | 33.8             | 58.6             | 44.3             |                                               |                      |                      |
| <i>TRUB2</i>   |                                | TruB pseudouridine synthase family member 2                           | 23.6              | 32.3            | 11.5             | 15.1             | 15.3             |                                               |                      |                      |
| <i>ACAD9</i>   | A0A7P0T871                     | Acyl-CoA dehydrogenase family member 9                                | 20.9              | 37.8            | 14.3             | 27.2             | 12.2             | -0.25                                         | -0.05                | -0.16                |
| <i>NDUFAF3</i> | Q9BU61                         | NADH:ubiquinone oxidoreductase complex assembly factor 3              | 116.9             | 132.3           | 60.3             | 126.0            | 72.0             | 0.13                                          | -0.08                | -0.13                |
| <i>MRPL41</i>  | Q8IXM3                         | Mitochondrial ribosomal protein L41                                   | 104.3             | 111.4           | 63.1             | 48.4             | 56.9             | -0.83*                                        | -0.52*               | -0.28                |
| <i>MT-ND6</i>  |                                | Mitochondrially encoded NADH:ubiquinone oxidoreductase core subunit 6 | 547.3             | 299.8           | 80.3             | 257.7            | 149.4            |                                               |                      |                      |
| <i>MT-ND2</i>  |                                | Mitochondrially encoded NADH:ubiquinone oxidoreductase core subunit 2 | 5384.0            | 4992.4          | 1876.9           | 3947.4           | 2130.6           |                                               |                      |                      |
| <i>MRPL28</i>  | Q13084                         | Mitochondrial ribosomal protein L28                                   | 139.4             | 171.3           | 72.1             | 81.7             | 116.7            | -0.82*                                        | -0.02                | -0.13                |
| <i>NDUFB2</i>  |                                | NADH:ubiquinone oxidoreductase subunit B2                             | 709.6             | 516.7           | 162.8            | 248.0            | 644.1            |                                               |                      |                      |
| <i>NDUFB7</i>  |                                | NADH:ubiquinone oxidoreductase subunit B7                             | 287.4             | 231.4           | 109.2            | 157.1            | 212.4            |                                               |                      |                      |
| <i>TOMM22</i>  | Q9NS69                         | Translocase of outer mitochondrial membrane 22                        | 158.3             | 197.9           | 84.0             | 93.2             | 142.4            | 0.49*                                         | -0.16                | -0.17                |
| <i>MRPL27</i>  | Q9P0M9                         | Mitochondrial ribosomal protein L27                                   | 212.7             | 120.2           | 52.7             | 76.5             | 181.1            | -0.54*                                        | -0.45*               | -0.50*               |
| <i>MRPL3</i>   | E7ETU7                         | Mitochondrial ribosomal protein L3                                    | 185.9             | 160.0           | 51.2             | 96.8             | 198.0            | -1.06*                                        | -0.10                | -0.03                |
| <i>MRPL15</i>  | Q9P015                         | Mitochondrial ribosomal protein L15                                   | 191.5             | 153.4           | 60.6             | 110.8            | 281.1            | -0.65*                                        | -0.01                | 0.01                 |
| <i>NDUFC2</i>  | O95298                         | NADH:ubiquinone oxidoreductase subunit C2                             | 840.9             | 647.7           | 133.8            | 400.6            | 735.4            | -1.05*                                        | -0.23                | -0.38*               |

|                   |        |                                                          |       |       |       |       |       |        |        |        |
|-------------------|--------|----------------------------------------------------------|-------|-------|-------|-------|-------|--------|--------|--------|
| <b>OMA1</b>       |        | OMA1 zinc metallopeptidase                               | 20.3  | 20.4  | 4.0   | 16.3  | 20.4  |        |        |        |
| <b>MRPL1</b>      | Q9BYD6 | Mitochondrial ribosomal protein L1                       | 44.4  | 26.2  | 7.1   | 28.9  | 105.1 | -0.56* | -0.06  | -0.08  |
| <b>GADD45GIP1</b> | Q8TAE8 | GADD45G interacting protein 1                            | 89.4  | 62.1  | 26.3  | 39.4  | 114.4 | -0.85* | 0.06   | 0.09   |
| <b>MRPL14</b>     | Q6P1L8 | Mitochondrial ribosomal protein L14                      | 168.6 | 184.4 | 68.8  | 92.5  | 130.7 | -1.02* | -0.16  | -0.08  |
| <b>COA3</b>       | Q9Y2R0 | Cytochrome c oxidase assembly factor 3                   | 145.1 | 106.2 | 41.2  | 100.5 | 156.0 | -0.86* | -0.41* | 0.04   |
| <b>NDUFA12</b>    | Q9UI09 | NADH:ubiquinone oxidoreductase subunit A12               | 273.9 | 237.6 | 112.1 | 180.7 | 338.1 | -1.57* | -0.18  | -0.28* |
| <b>MRPL40</b>     | Q9NQ50 | Mitochondrial ribosomal protein L40                      | 108.1 | 80.9  | 27.5  | 56.1  | 139.6 | -0.91* | -0.15  | -0.21  |
| <b>NDUFAF8</b>    |        | NADH:ubiquinone oxidoreductase complex assembly factor 8 | 537.7 | 276.0 | 122.5 | 164.4 | 504.1 |        |        | -0.10  |
| <b>MRPS17</b>     |        | Mitochondrial ribosomal protein S17                      | 40.1  | 34.0  | 15.3  | 20.0  | 44.7  | 0.04*  | -0.35  | -0.04  |

---

“\*” represents *p*-value below 0.05, and “Uni” indicates uninduced.

**Supplemental Table S4.** Annotation of common DEGs in GO: 0000165 (MAPK cascade) in the three AAV cases.

| Gene Name            | Description                         | Average TPM       |                       |                  |                  |                  |                  |
|----------------------|-------------------------------------|-------------------|-----------------------|------------------|------------------|------------------|------------------|
|                      |                                     | Host 293<br>(0 h) | Case A<br>(Uninduced) | Case A<br>(48 h) | Case A<br>(72 h) | Case B<br>(48 h) | Case C<br>(48 h) |
| <b><i>THPO</i></b>   | Thrombopoietin                      | 0.08              | 0.20                  | 0.54             | 0.59             | 0.45             | 0.39             |
| <b><i>TF</i></b>     | Transferrin                         | 0.05              | 0.26                  | 1.66             | 1.71             | 0.26             | 1.00             |
| <b><i>MAPK10</i></b> | Mitogen-activated protein kinase 10 | 0.16              | 0.87                  | 1.56             | 2.39             | 2.18             | 1.23             |
| <b><i>GBP1</i></b>   | Guanylate binding protein 1         | 0.09              | 0.07                  | 0.41             | 0.62             | 0.54             | 0.35             |
| <b><i>UNC5CL</i></b> | Unc-5 family C-terminal like        | 0.48              | 0.59                  | 1.93             | 4.31             | 1.60             | 1.08             |
| <b><i>GPNMB</i></b>  | Glycoprotein nmb                    | 0.63              | 1.22                  | 2.73             | 3.24             | 2.87             | 3.77             |
| <b><i>PAK6</i></b>   | p21 (RAC1) activated kinase 6       | 0.10              | 0.29                  | 0.91             | 1.73             | 0.45             | 0.31             |
| <b><i>SH3RF2</i></b> | SH3 domain containing ring finger 2 | 0.29              | 0.94                  | 2.55             | 3.63             | 1.25             | 1.06             |
| <b><i>DUSP8</i></b>  | Dual specificity phosphatase 8      | 3.28              | 6.91                  | 16.50            | 27.77            | 8.95             | 8.13             |

## REFERENCES

- Araujo FD, Stracker TH, Carson CT, Lee DV, Weitzman MD (2005) Adenovirus type 5 E4orf3 protein targets the Mre11 complex to cytoplasmic aggresomes. *J Virol* 79:11382-11391. doi: 10.1128/JVI.79.17.11382-11391.2005
- Aurnhammer C, Haase M, Muether N, Hausl M, Rauschhuber C, Huber I, Nitschko H, Busch U, Sing A, Ehrhardt A, Baiker A (2012) Universal real-time PCR for the detection and quantification of adeno-associated virus serotype 2-derived inverted terminal repeat sequences. *Hum Gene Ther Methods* 23:18-28. doi: 10.1089/hgtb.2011.034
- Debbas M, White E (1993) Wild-type p53 mediates apoptosis by E1A, which is inhibited by E1B. *Genes Dev* 7:546-554. doi: 10.1101/gad.7.4.546
- Heinz LX, Rebsamen M, Rossi DC, Staehli F, Schroder K, Quadroni M, Gross O, Schneider P, Tschopp J (2012) The death domain-containing protein Unc5CL is a novel MyD88-independent activator of the pro-inflammatory IRAK signaling cascade. *Cell Death Differ* 19:722-731. doi: 10.1038/cdd.2011.147
- Kim TW, Kang YK, Park ZY, Kim YH, Hong SW, Oh SJ, Sohn HA, Yang SJ, Jang YJ, Lee DC, Kim SY, Yoo HS, Kim E, Yeom YI, Park KC (2014) SH3RF2 functions as an oncogene by mediating PAK4 protein stability. *Carcinogenesis* 35:624-634. doi: 10.1093/carcin/bgt338
- Lee Z, Lu M, Irfanullah E, Soukup M, Hu WS (2022) Construction of an rAAV producer cell line through synthetic biology. *ACS Synth Biol* 11:3285-3295. doi: 10.1021/acssynbio.2c00207
- Lin KM, Lin SJ, Lin JH, Lin PY, Teng PL, Wu HE, Yeh TH, Wang YP, Chen MR, Tsai CH (2020) Dysregulation of dual-specificity phosphatases by epstein-barr virus LMP1 and its impact on lymphoblastoid cell line survival. *Journal* 94:e01837-19. doi: 10.1128/jvi.01837-19
- Lu M, Lee Z, Lin YC, Irfanullah I, Cai W, Hu WS (2024) Enhancing the production of recombinant adeno-associated virus in synthetic cell lines through systematic characterization. *Biotechnol Bioeng* 121:341-354. doi: 10.1002/bit.28562
- Saade M, de Souza GA, Scavone C, Kinoshita PF (2021) The role of GPNMB in inflammation. *Front Immunol* 12:674739. doi: 10.3389/fimmu.2021.674739
- Schaley JE, Polonskaia M, Hearing P (2005) The adenovirus E4-6/7 protein directs nuclear localization of E2F-4 via an arginine-rich motif. *J Virol* 79:2301-2308. doi: 10.1128/JVI.79.4.2301-2308.2005
- Shastri AA, Hegde V, Peddibhotla S, Feizy Z, Dhurandhar NV (2018) E4orf1: A protein for enhancing glucose uptake despite impaired proximal insulin signaling. *PLoS One* 13:e0208427. doi: 10.1371/journal.pone.0208427
